# Supplementary material
Source: publisher figshare collection journal article supplement (https://gsajournals.figshare.com/ndownloader/files/17710085)
Supplement: Supplementary file 1 [file 17710085]

## Sheet: Sheet1
Table S7. Primers for validation of SVs
SV ID	Forward primer			Reverse primer
	Name	Sequence		Name	Sequence
G351-SV1	G351-SV1_f1	CCTCAACGTCCTCACTGACA		G351-SV1_r1	TCCCAATTCCCAACATCATT
G351-SV2	G351-SV2_f1	ATGCACTTGCTCCGAAGAGT		G351-SV2_r1	AAAATGCGACATTTGGCTTC
G347-SV1	G347-SV1_f1	GAAGCCTCGTCCACACAAAT		G347-SV1_r1	CTCCAAGGACATGTTTGGCT
G347-SV1	G347-SV1_f2	ACAAAATGTATGCTTGGCCC		G347-SV1_r2	CTGGCTAAGCGGCAGTAAAC
G347-SV2	G347-SV2_f1	CTCACCATCACACAAATGGC		G347-SV2_r1	GAACGGTAAAATGTGGGGTG
I223_SV1	I223-SV1_f1	CGCTAGCTAGTTCGTCCCTG		I223-SV1_r1	ATCCAGCTGAGGCTGTGTTT
I223_SV1	I223-SV1_f2	CTGCAAATATGGTCAATGCG		I223-SV1_r2	CGCCACATCACGTTGTTTAC
I223_SV2	I223-SV2_f1	CTGGAAGTATGGGAGCAAGC		I223-SV2_r1	ACCACGCACAGTGAGTCAAA
I223_SV2	I223-SV2_f2	ATCGCAATGTTCAATCACGA		I223-SV2_r2	ACACGCATGTCACCACGTAT
I223_SV3	I223-SV3_f1	GTTGGAGAAAGAGCGTGGAG		I223-SV3_r1	GTCAAAGCCGATGGTCAAAT
I223_SV3	I223-SV3_f2	ATCAGTTCTCGCTCTGGCAT		I223-SV3_r2	CGATGTGTGCTTTGCAAGTT
I223_SV4	I223-SV4_f1	CCTGATCACCCTGCAAAGTT		I223-SV4_r1	CTGGGTCGTGTGCAGAACTA
I223_SV5	I-223-SV5_f2	ATCAGCTTGAGATTCCACGG		I-223-SV5_r2	GCTCCCTTCTCTGTTCATCG
I218_SV1	I218-SV1_f1	TGTCACAAAGCCCATGTTGT		I218-SV1_r1	GAGCTCATGACAAGCATGGA
I218_SV2	I218-SV2_f9	CCCAGCAAAGATAGCAGGAA		I218-SV2_r9	GAACACAAATTGCCAAAGCA
I218_SV2	I218-SV2_f4	CCACGATTTCGTGTGTATCG		I218-SV2_r4	CAAGAATGCCACAGAGGGTT
I218_SV2	I218-SV2_f2	TCTGCTGTCTTGGTGGTGTC		I218-SV2_r2	GGGAAAGTGGGAATGAGGTT
I218_SV3	I218-SV3_f1	TGTGATGGCCTACCAGATCA		I218-SV3_r1	GAACTGGTGGTCGTGGAGAT
I154_SV1	I154-SV1-f1	CAATTGTGATTCCATCGCAC		I154-SV1-r1	GGTATCGGCTACAATTCGGA
I154_SV2	I154-SV2-f1	TTGCTTTTGCAATTTGCTTG		I154-SV2-r1	TAGGCCATTCCCTATGTTGC
I154_SV2	I154-SV2-f2	CTGACAGACTTGCGGCAGTA		I154-SV2-r2	AGGATTGTGGGAATGCAGAC
I227_SV1	I227-SV1_f1	GGCGGCTTCTCTCCTAAATC		I227-SV1_r1	TCTCTCAAAAATTCCCACCG
I227_SV1	I227-SV1_f2	TAATCATTTTCCCGGACGAG		I227-SV1_r2	GCATTCCAACATGGGCTAGT
I226_SV1	I226-SV1_f1	ATGGTCTGTCCTCTTGGTGG		I226-SV1_r1	GGTTGTCCCTCCAAGTTCCT
I226_SV1	I226-SV1_f2	GCATTGGTGATGTCCTGTTG		I226-SV1_r2	TTGCCCTGAACAATGAACAA
I224_SV1	I224-SV1_f1	CAAAGCAACACGCTCCAATA		I224-SV1_r1	CATATCCGGCCCTTTCTACA
I224_SV2	I-224-SV2-f2	CAATTTAACTCCTCCGCTCG		I-224-SV2-r2	CCCTGCTACAAGCCAGAAAT
Control	Control_f	GACCGGATACCAGAAGCTGA		Control_r	GTCTTGAACATGCCCTGGTT
